# Supplementary material
Source: PubMed Central journal article supplement (PMC7609584)
Supplement: NIHMS1619217-supplement-1.pdf [file NIHMS1619217-supplement-1.pdf]

**Supplemental Data**

**Table S.1. Neuropsychological measures used for cognitive diagnosis across sites**

| <b>Neuropsychological measures</b>        |                                                                                                                                                                                                      |                                                                                                                                                                                                     |                                                                                                                                                                                         |
|-------------------------------------------|------------------------------------------------------------------------------------------------------------------------------------------------------------------------------------------------------|-----------------------------------------------------------------------------------------------------------------------------------------------------------------------------------------------------|-----------------------------------------------------------------------------------------------------------------------------------------------------------------------------------------|
| <b>Cognitive domain</b>                   | <b>University of Washington/Oregon Health and Sciences University</b>                                                                                                                                | <b>Stanford University</b>                                                                                                                                                                          | <b>University of Pennsylvania</b>                                                                                                                                                       |
| <b>Memory</b>                             | Hopkins Verbal Learning Test-Revised [1]<br>Logical Memory I & II [2]<br>Brief Visual Memory Test-Revised [4]                                                                                        | Hopkins Verbal Learning Test-Revised [1]<br>Craft Story Recall [3]<br>Benson Complex Figure recall [5]                                                                                              | Hopkins Verbal Learning Test-Revised [1]<br>Mattis Dementia Rating Scale – Memory [16]                                                                                                  |
| <b>Visuospatial</b>                       | Judgment of Line Orientation [6]<br>Clock copy [7]<br>Brief Visual Memory Test-Revised copy [4]                                                                                                      | Judgment of Line Orientation [6]<br>Clock copy [7]<br>Benson Complex Figure copy [5]                                                                                                                | Judgment of Line Orientation [6]<br>Mattis Dementia Rating Scale – Construction [16]                                                                                                    |
| <b>Language</b>                           | Boston Naming Test [8]<br>Shipley Vocabulary [10]<br>Semantic verbal fluency [12]                                                                                                                    | Multilingual Naming Test [9]<br>Wechsler Test of Adult Reading [11]<br>Semantic verbal fluency [12]                                                                                                 | Boston Naming Test [8]<br>Semantic verbal fluency [12]                                                                                                                                  |
| <b>Executive/Attention/Working Memory</b> | Clock Drawing Test [7]<br>Phonemic verbal fluency [12]<br>Trailmaking test, parts A & B [12]<br>Letter-Number Sequencing [13]<br>Digit Symbol [14]<br>Digit Span [14]<br>Stroop (Golden version)[15] | Clock Drawing Test [7]<br>Phonemic verbal fluency [12]<br>Trailmaking test, parts A & B [12]<br>Letter-Number Sequencing [13]<br>Digit Symbol [14]<br>Number Span<br>Stroop (Victoria version) [12] | Clock Drawing Test [7]<br>Phonemic verbal fluency [12]<br>Letter-Number Sequencing [13]<br>Mattis Dementia Rating Scale – Initiation & Perseveration, Attention, Conceptualization [16] |

[1] R.H.B. Benedict, D. Schretlen, L. Groninger, J. Brandt, The Hopkins Verbal Learning Test-Revised: Normative data and analysis of inter-form and inter-rater reliability., *The Clinical Neuropsychologist* 12 (1998) 43-55.

[2] D. Wechsler, *Wechsler Memory Scale-Revised Manual*, The Psychological Corporation, San Antonio, 1987.

[3] S. Craft, J. Newcomer, S. Kanne, S. Dagogo-Jack, P. Cryer, Y. Sheline, J. Luby, A. Dagogo-Jack, A. Alderson, Memory improvement following induced hyperinsulinemia in Alzheimer's disease, *Neurobiol Aging* 17(1) (1996) 123-30.

[4] R.H.B. Benedict, *BVMT-R Manual*, PAR, Odessa, FL, 1988.

[5] K.L. Possin, V.R. Laluz, O.Z. Alcantar, B.L. Miller, J.H. Kramer, Distinct neuroanatomical substrates and cognitive mechanisms of figure copy performance in Alzheimer's disease and behavioral variant frontotemporal dementia, *Neuropsychologia* 49(1) (2011) 43-8.

[6] A.L. Benton, A.B. Sivan, K. Hamsher, N.R. Varney, O. Spreen, *Contributions to neuropsychological assessment: A clinical manual*, Oxford University Press, New York, NY, 1994.

[7] I. Rouleau, D.P. Salmon, N. Butters, C. Kennedy, K. McGuire, Quantitative and qualitative analyses of clock drawings in Alzheimer's and Huntington's disease, *Brain Cogn* 18(1) (1992) 70-87.

[8] E. Kaplan, H. Goodglass, S. Weintraub, *Boston Naming Test*, Lea & Febiger, Philadelphia, PA, 1983.

[9] I. Ivanova, D.P. Salmon, T.H. Gollan, The multilingual naming test in Alzheimer's disease: clues to the origin of naming impairments, *J Int Neuropsychol Soc* 19(3) (2013) 272-83.

[10] W.C. Shipley, *Shipley-2 Manual*, Western Psychological Services, Los Angeles, CA, 2009.

[11] H.A. Holdnack, *Wechsler Test of Adult Reading*, The Psychological Corporation, San Antonio, TX, 2001.

[12] E. Strauss, E.M.S. Sherman, O. Spreen, *A compendium of neuropsychological tests : administration, norms, and commentary*, 3rd ed., Oxford University Press, Oxford ; New York, 2006.

[13] D. Wechsler, *WAIS-III® Administration and Scoring Manual*, The Psychological Corporation Harcourt Brace & Company, San Antonio, TX, 1997.

[14] D. Wechsler, *Wechsler Adult Intelligence Scale-Revised manual*, The Psychological Corporation, San Antonio, 1987.

[15] C.J. Golden, *Stroop Color and Word Test: A Manual for Clinical and Experimental Uses*, Stoelting, Chicago, IL, 1978.

[16] Mattis, S. *Dementia Rating Scale: Manual*. Odessa, FL: Psychological Assessment Resources, 2001.

**Table S2. Baseline characteristics by cognitive diagnosis**

|                                   | <b>Nondemented</b><br>n = 588 | <b>PDD</b><br>n = 108 | <b>p*</b> |
|-----------------------------------|-------------------------------|-----------------------|-----------|
| <b>Age (years)</b>                |                               |                       |           |
| mean (sd)                         | 68.0 (8.0)                    | 73.4 (8.0)            | <0.0001   |
| range                             | 41.9 – 94.0                   | 52.5 – 89.0           |           |
| <b>Education (years)</b>          |                               |                       |           |
| mean (sd)                         | 16.1 (2.5)                    | 15.6 (2.6)            | 0.038     |
| range                             | 8 - 20                        | 8 - 20                |           |
| <b>Sex</b>                        |                               |                       |           |
| N (%) male                        | 387 (65.8)                    | 91 (84.3)             | <0.001    |
| <b>Disease duration (years)</b>   |                               |                       |           |
| mean (sd)                         | 8.1 (5.7)                     | 10.9 (6.1)            | <0.0001   |
| range                             | 0 - 35                        | 1 – 28                |           |
| <b>MDS-UPDRS part III</b>         |                               |                       |           |
| mean (sd)                         | 26.2 (12.5)                   | 39.9 (16.3)           | <0.0001   |
| range                             | 1 – 72.4                      | 11 – 85.6             |           |
| <b>LEDD mg/d</b>                  |                               |                       |           |
| mean (sd)                         | 634.5 (505.3)                 | 690.8 (423.6)         | 0.277     |
| range                             | 0 - 3375                      | 0 - 2095              |           |
| <b>Geriatric Depression Scale</b> |                               |                       |           |
| mean (sd)                         | 3.9 (2.7)                     | 5.9 (2.8)             | <0.0001   |
| range                             | 0 - 13                        | 0 - 14                |           |
| <b>PD-MCI</b>                     |                               |                       |           |
| N (%)                             | 270 (45.9)                    | -                     | -         |
| <b>APOE ε4 allele (n = 654)</b>   |                               |                       |           |
| N (%)                             | 132 (24.0)                    | 31 (29.8)             | 0.209     |
| <b>GBA variant (n = 648)</b>      |                               |                       |           |
| N (%)                             | 43 (7.9)                      | 22 (21.4)             | <0.001    |
| <b>MoCA score (n = 506)</b>       |                               |                       |           |
| mean (sd)                         | 25.6 (2.9)                    | 17.9 (4.6)            | <0.0001   |
| range                             | 17 - 30                       | 6 - 27                |           |

\*p-values based on t-tests for continuous variable and chi-square tests for discrete variables.

Abbreviations: *APOE*, apolipoprotein E; *GBA*, *glucocerebrosidase gene*; LEDD, levodopa equivalent daily dose; MDS-UPDRS, United Parkinson's Disease Rating Scale, Movement Disorders Society revision; PDD, Parkinson's disease dementia

**Table S3. Baseline characteristics, nonconverters vs. converters**

|                                    | <b>Nonconverters</b><br>n = 329 | <b>Converters</b><br>n = 115 | p*      |
|------------------------------------|---------------------------------|------------------------------|---------|
| <b>Age (years)</b>                 |                                 |                              |         |
| mean (sd)                          | 66.6 (7.9)                      | 71.5 (7.2)                   | <0.0001 |
| range                              | 43.0 – 88.0                     | 54.8 – 94.0                  |         |
| <b>Education (years)</b>           |                                 |                              |         |
| mean (sd)                          | 16.2 (2.5)                      | 15.7 (2.6)                   | 0.088   |
| range                              | 10 - 20                         | 8 - 20                       |         |
| <b>Sex</b>                         |                                 |                              |         |
| N (%) male                         | 207 (62.9)                      | 85 (73.9)                    | 0.032   |
| <b>Disease duration (years)</b>    |                                 |                              |         |
| mean (sd)                          | 7.2 (5.1)                       | 9.5 (5.9)                    | 0.0001  |
| range                              | 0 - 35                          | 1 – 33                       |         |
| <b>Length of follow up (years)</b> |                                 |                              |         |
| mean (sd)                          | 4.4 (2.6)                       | 4.8 (2.4)                    | 0.187   |
| range                              | 1 - 11                          | 1 - 11                       |         |
| <b>Number of visits</b>            |                                 |                              |         |
| median                             | 4                               | 5                            | 0.049   |
| range                              | 2 - 9                           | 2 - 8                        |         |
| <b>MDS-UPDRS part III</b>          |                                 |                              |         |
| mean (sd)                          | 24.4 (11.5)                     | 31.3 (13.0)                  | <0.0001 |
| range                              | 2.3 – 72.4                      | 4.7 – 71.3                   |         |
| <b>LEDD mg/d</b>                   |                                 |                              |         |
| mean (sd)                          | 611.3 (453.7)                   | 795.1 (560.9)                | 0.0005  |
| range                              | 0 - 2328                        | 0 - 2960                     |         |
| <b>Geriatric Depression Scale</b>  |                                 |                              |         |
| mean (sd)                          | 3.3 (2.7)                       | 4.1 (3.0)                    | 0.013   |
| range                              | 0 - 12                          | 0 - 13                       |         |
| <b>PD-MCI</b>                      |                                 |                              |         |
| N (%)                              | 112 (34.0)                      | 69 (60.0)                    | <0.001  |
| <b>APOE ε4 allele (n = 412)</b>    |                                 |                              |         |
| N (%)                              | 66 (21.6)                       | 34 (32.1)                    | 0.030   |
| <b>GBA variant (n = 410)</b>       |                                 |                              |         |
| N (%)                              | 15 (4.9)                        | 10 (9.5)                     | 0.089   |
| <b>MoCA score (n = 298)</b>        |                                 |                              |         |
| mean (sd)                          | 26.0 (2.7)                      | 23.9 (2.6)                   | <0.0001 |
| range                              | 18 - 30                         | 18 - 29                      |         |

\*p-values based on t-tests for continuous variable, chi-square tests for discrete variables, and the Kruskal Wallis test for medians.

Abbreviations: *APOE*, apolipoprotein E; *GBA*, *glucocerebrosidase gene*; LEDD, levodopa equivalent daily dose; MDS-UPDRS, United Parkinson's Disease Rating Scale, Movement Disorders Society revision; PDD, Parkinson's disease dementia
